# Supplementary material for: In vivo structure and dynamics of the SARS-CoV-2 RNA genome
Source: PubMed Central journal article supplement (PMC8478942; doi:10.1038/s41467-021-25999-1), 2021-09-28

## Supplementary Figure legends

**Supplementary Fig.1| Heat maps of RNA-RNA interactions along the SARS-CoV-2 gRNA in particular replicates** Similar to Fig. 1c, except that each plot represents a particular replicate. The bottom heatmaps show corresponding non-ligate controls.

**Supplementary Fig.2| Correlation of chimeric read counts between samples** Scatter plots show correlation of chimeric read counts between ligated samples (a and b), as well as ligated and non-ligated samples (c, d and e). r: two sided Pearson's correlation coefficients, P: Pearson's correlation test p-values in all the panels.

**Supplementary Fig.3| proportion of 5' -3' and 3' -5' chimeras in simplified SPLASH and COMRADES** **a**, simplified SPLASH chimeras from indicated samples are divided into short-distance chimeras (distance < 200nt) and long-distance chimeras (distance > 200nt) according to the distance of the genome of the two segments. **b**, same as **a**, but chimeras are from COMRADES data.

**Supplementary Fig.4| Structure of 5' -UTRs** **a**, chimeras per million total mapped reads contact matrix in 5' -UTR region. Stem-loops were indicated as rectangles. **b**, Canonical SARS-CoV-2 5' -UTR structure in C sample. Basepairing of indicated arches. Colors represent the log<sub>2</sub> base pairing score normalized by total mapped read counts. **c**, Same as **b**, except that Colors represent the log<sub>2</sub> base pairing score normalized by total mapped read counts in L samples. **d**, Same as **b**, except that Colors represent the log<sub>2</sub> base pairing score normalized by total mapped read counts in V samples. **e**, ROC curves for simplified SPLASH data on 5'-UTR (using known consensus base-pairing information as true positives) compared to COMRADES data (Ziv O et al., 2020). **f**, Bar chart showing positive predictive value (PPV) and sensitivity in three indicated stages.

**Supplementary Fig.5| Structure of 3' -UTRs** **a**, chimeras per million total mapped reads contact matrix in 3' -UTR region. **b**, Canonical basepairing of SARS-CoV-2 3' -UTR. Colors represent the log<sub>2</sub> base pairing score normalized by total

mapped read counts. **c**, Alternative conformation B of SARS-CoV-2 3' -UTR. Colors represent the log<sub>2</sub> base pairing score normalized by total mapped read counts. **d**, Alternative S2M structure of SARS-CoV-2 3' -UTR. Colors represent the log<sub>2</sub> base pairing score normalized by total mapped read counts. **e**, same as b), but Colors represent the log<sub>2</sub> base pairing score normalized by total mapped read counts from COMRADES data. **f**, same as c), but Colors represent the log<sub>2</sub> base pairing score normalized by total mapped read counts from COMRADES data. **g**, same as d), but Colors represent the log<sub>2</sub> base pairing score normalized by total mapped read counts from COMRADES data.

**Supplementary Fig.6| Structure of genome cyclization a**, chimeras per million total mapped reads contact matrix supporting genome cyclization. **b**, Base pairing 5' -UTR and 3' -UTR in C, L and V samples. log<sub>2</sub> base pairing score normalized by total mapped read counts from indicated sample.

**Supplementary Fig.7 characteristics of TRS-L chimeras a and b**, Viewpoint histograms showing binding positions of the TRS-L region (first 100nt) along the SARS-CoV-2 genome in indicated samples for stringent (a) and relax pipeline(b). 3' -5' chimeras and 5' -3' chimeras were separately plotted. As controls, we also plotted interaction position in non-ligated samples and in RNA-seq data. To show that the interaction peaks especially from 3' -5' chimeras are specific. **c**, Schematic of ligation products and mapping details of chimeras. Junction sites are defined as indicated. **d**, Same as Fig.2C, but the chimeras are identified by relax pipeline. **e**, Same as Fig.2e, but the chimeras are identified by relax pipeline, which results in plenty of 5' -3' chimeras, so 5' -3' chimeras were also showed, indicating highly consensus of junction sites.

**Supplementary Fig.8| mapping details of 3' -5' chimeras supporting TRSL and TRS-B interactions a**, similar to Fig.2e, lines show mapping of 3' -5' chimeras overlapping the TRS-L: interactions. **b**, same to **a**, but chimeras are called from COMADES data (gRNA sample1, SRR12252274)

**Supplementary Fig.9| base pairing of TRSL interactions** similar to Fig.2f, all the base pairs are coloured by log<sub>2</sub> base pairing scores normalized by total mapped reads in indicated samples.

**Supplementary Fig.10| Identification and validation of novel sgRNAs a and c**, Contact matrix of 3' -5' chimeric reads indicated specific interactions of TRS-L and 3.9K (a) and 12.3K (regions). Color depict chimeric reads per 1million mapped reads (CPM). **b** and **d**, Randomly selected chimeric reads showed distribution of reads around junction sites. The redlines indicated 3' arm in chimeric reads, while blue lines indicated 5' arm in chimeric reads. **c** and **e**, base pairing of TRS-L region and 3.9k (**c**) and 12.3K(**e**) regions **f** and **g**, Sanger sequencing validation of 3.9K (**f**) and 12.3K(**g**) novel sgRNAs from independent non-crosslinked samples. Bases around junction sites were shown.

**Supplementary Fig.11| base pairing around FSE a**, base pairing of canonical and alternative structures of FSE in indicated samples. Paired bases are coloured by log<sub>2</sub> base pairing scores. **b**, base pairing of canonical and alternative structures of FSE in indicated samples from COMRADES data. Paired bases are coloured by log<sub>2</sub> base pairing scores.

**Supplementary Fig.12| base pairing of additional FSE arches** base pairing of additional FSE arches of FSE in indicated samples. Paired bases are coloured by log<sub>2</sub> base pairing scores.

**Supplementary Fig.13| mapping details of chimeras spanning FSE arches** lines show mapping of chimeras overlapping the TRS-L: interactions. blue lines show 5' -half of chimeras, and red lines show 3' -half of chimeras.

**Supplementary Fig.14| mapping details of chimeras from COMRADES data spanning FSE arches** same as Supplementary Fig.13, except that data are from COMRADES data.

**Supplementary Fig.15| Clustering and PCA of samples a**, cluster of Pearson correlation efficiencies between samples. **b**, Principal component analysis (PCA) interaction data from samples indicated in A.

**Supplementary Fig.16| quantification of interactions in different phase of SARS-CoV-2 virus life cycle** **a**, Arc plots show distribution of enriched interaction pairs in indicated samples. For clear visualization, continuous 10nt-bin pairs were merged. 5'-UTR-mediated interactions are marked in red, 3'-UTR-mediated interactions are marked in blue, and others are marked in gray. **b**, upset plot show overlapping of enriched interactions (10nt-bin pairs) in indicated samples. **c**, upset plot show overlapping of enriched interactions (10nt-bin pairs) in indicated samples, gRNA and mRNA interaction clusters from COMRADES data (Ziv O et.al, 2020) were also included. **d**, Histograms of spans of enriched interactions in each stage. **e**, RNA-interactions labelled by RNA coordinates.

**Supplementary Fig.17| Dynamics of interactions in different phase of SARS-CoV-2 virus life cycle** **a**, Vennplot overlap of differential interactions of VvsC and VvsL. **b**, correlation of log<sub>2</sub>FCs as indicated. **c**, Arc plots show strengthened and weakened interactions. Differential interactions with abs(log<sub>2</sub>FC) cutoff  $\geq \pm 5$  were plotted **d**, Heatmaps show log<sub>2</sub>FC of all the TRS-L (first 100nt) interactions in different comparisons. Note that almost all interactions are not changed or weakened, except that TRS-L: S interaction is strengthened.

**Supplementary Fig.18| Characteristics of boundaries in different phase of SARS-CoV-2 virus life cycle** **a**, Correlation of insulation score in different samples. r: two-sided Pearson's correlation coefficient, P: Pearson's correlation test p-value. **b**, Upset plot show overlaps of boundaries in different stages. C, L and V samples shared boundaries comprised most of boundaries. **c**, Histograms of domain length in different samples. **d**, Violin plot compare ratio of intra-domain/inter-domain interactions. Two-sided Wilcoxon rank sum tests were used to compare indicated groups, no adjustment of multiple comparisons was made. Boxplots show largest (upper whisker), smallest (lower whisker), 50% quantile (center), upper hinge (75% quantile) and lower hinge (25% quantile).

**Supplementary Fig.19| Shannon entropy of SARS-CoV-2 genome** **a**, Shannon entropy values along the SARS-CoV-2 genome. **b**, density plot of Shannon entropies from different samples. Shannon entropies were highest in L while lowest in V. C < L (one-sided "less" Wilcoxon rank sum test, P=1.61e-258, W=2175030), V < L (one-sided

“less” Wilcoxon rank sum test,  $P < 2.2e-999$ ,  $W = 1622582$ ),  $V < C$  (one-sided “less” Wilcoxon rank sum test,  $P = 3.62e-51$ ,  $W = 3463729$ ). **c**, Dotplots show correlations between Shannon entropy values and Insulation scores.  $r$ : two-sided Pearson’s correlation coefficient,  $P$ : Pearson’s correlation test p-value.

**Supplementary Fig.20| SARS-CoV-2 recombination with several SARS related coronaviruses.** SARS-CoV-2 recombination with several SARS related coronaviruses. SimPlot genetic similarity plot between SARS-CoV-2 Wuhan-Hu-1 and representative CoV sequences using a 200–base pair (bp) window at a 10-bp step and the Kimura two-parameter model. Regions between breakpoints (99% confidence) were indicated as black lines on the top. Domain boundaries were indicated as breaks on x axis.

### **Supplementary data1**

Statistics of mapping and chimeras of all the samples

### **Supplementary data2**

contact matrix of each group of datasets.

### **Supplementary data3**

DESeq2 statistics for enrichment of interaction bin pairs in ligated samples. The statistics of baseMean: mean of normalized counts for all samples; log2FoldChange: log2 fold change; lfcSE: standard error; stat: Wald statistic; pvalue: Wald test p-values; padj: Benjamini & Hochberg adjusted p values.

Supplementary Fig1

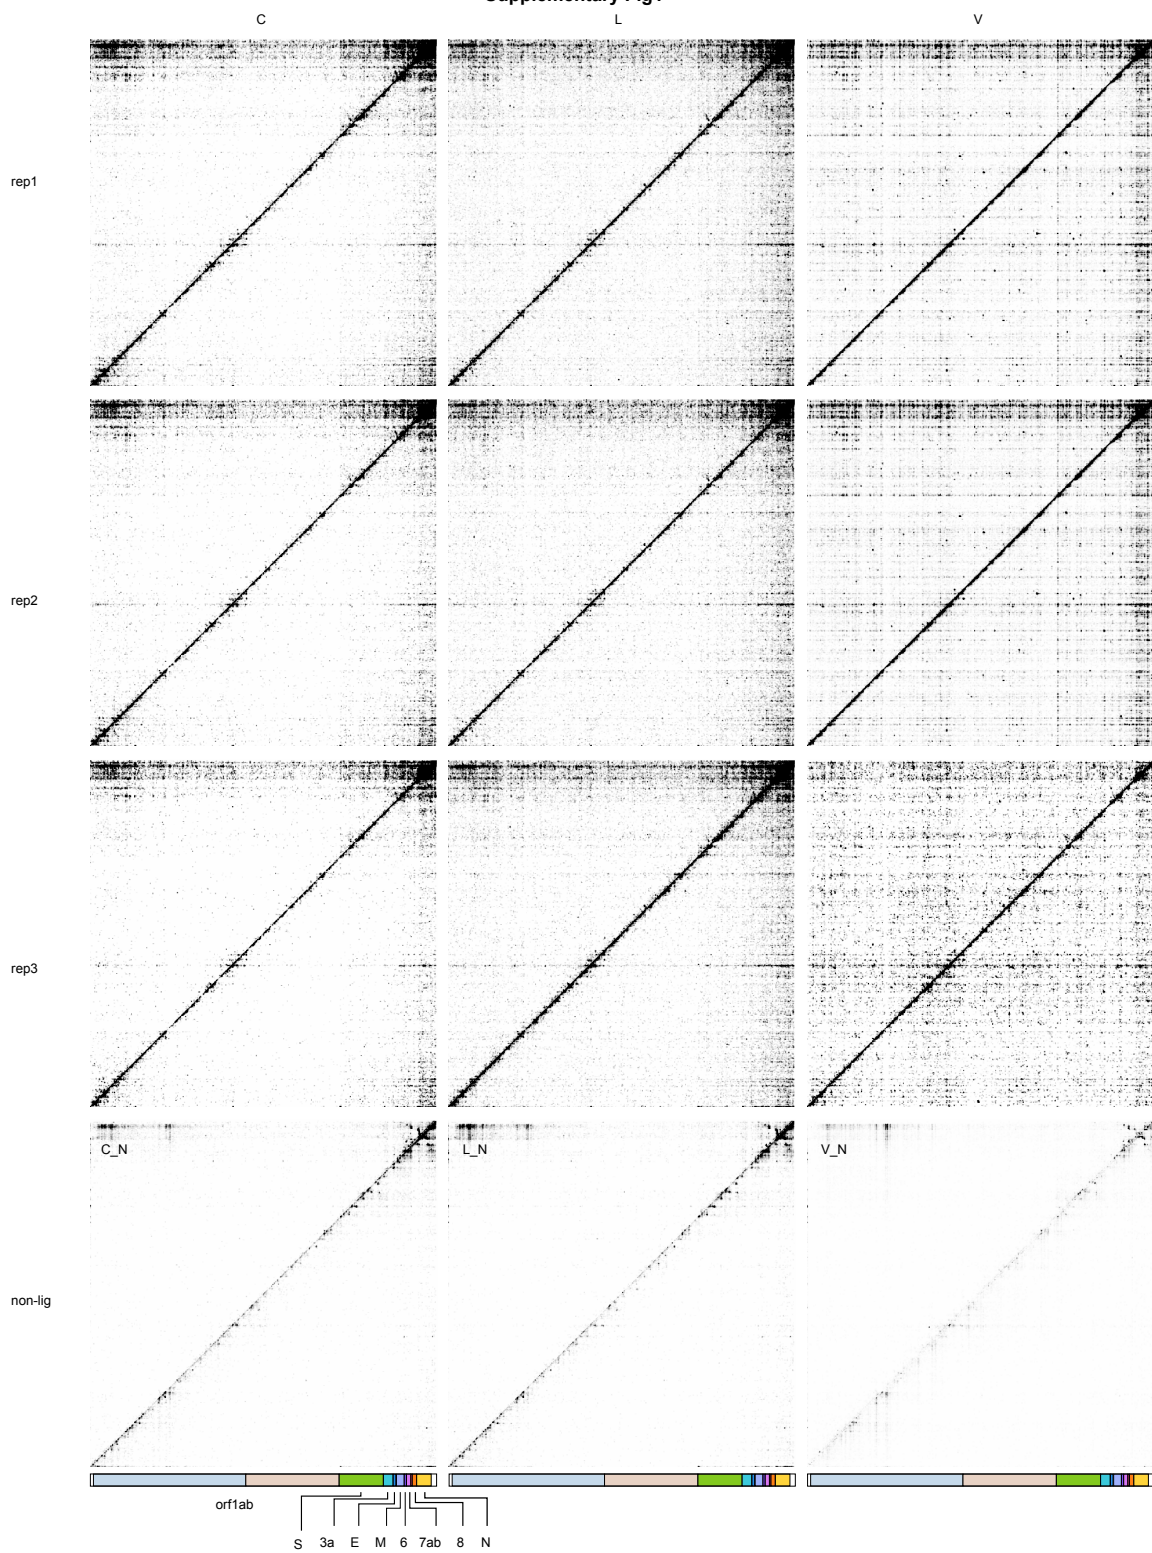

## Supplementary Fig2

**a**

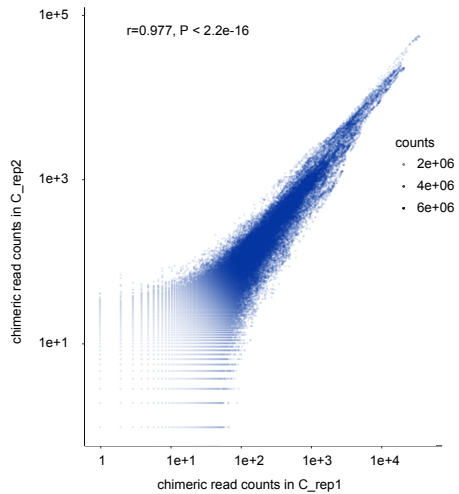

**b**

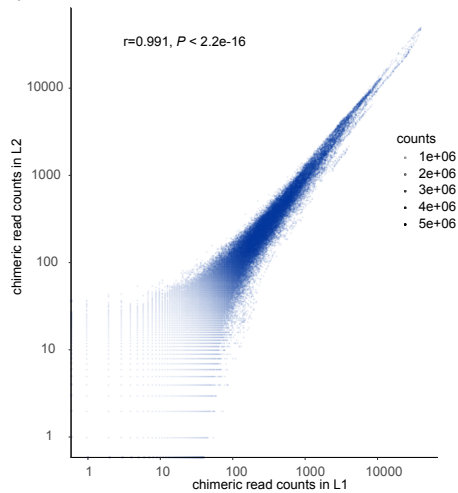

**c**

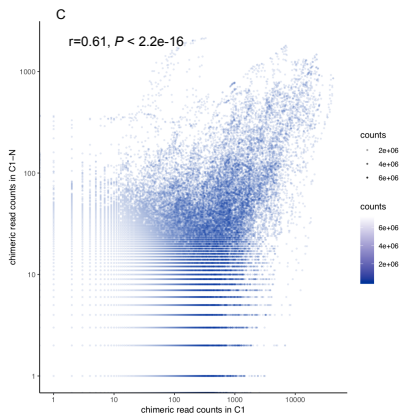

**d**

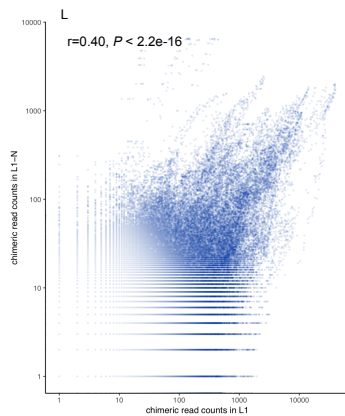

**e**

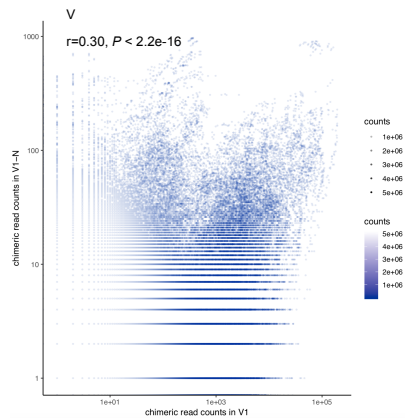

### Supplementary Fig3

**a**

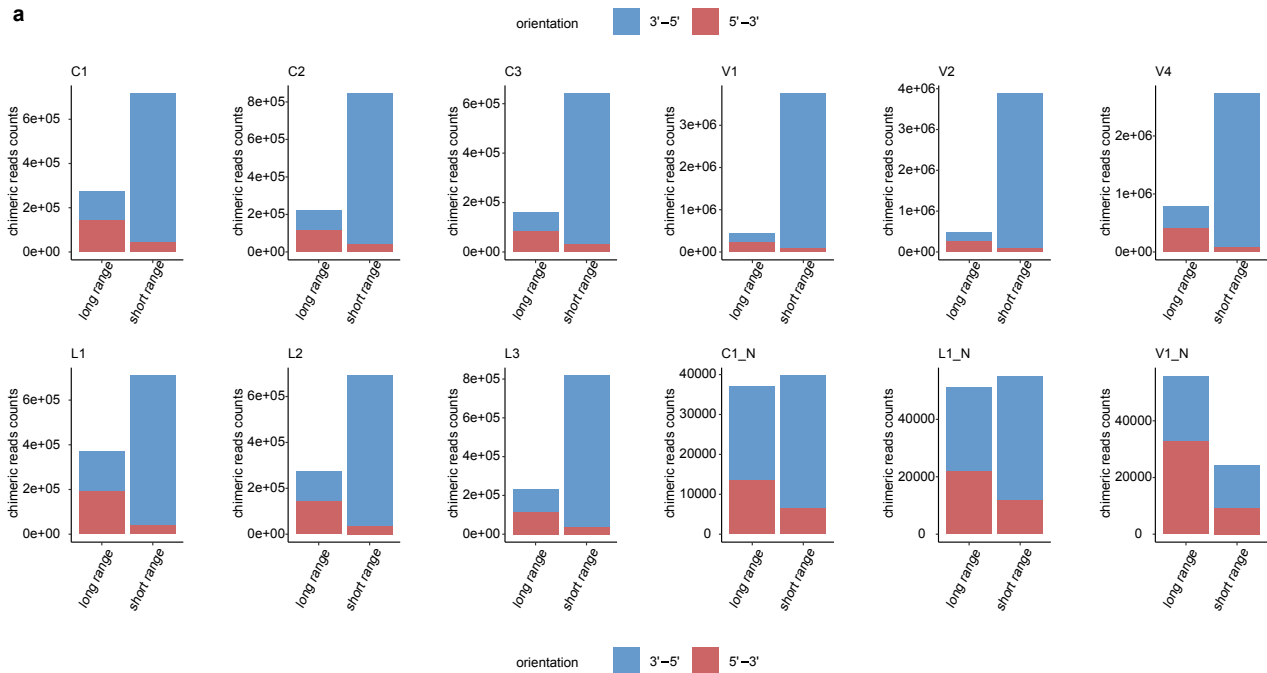

**b**

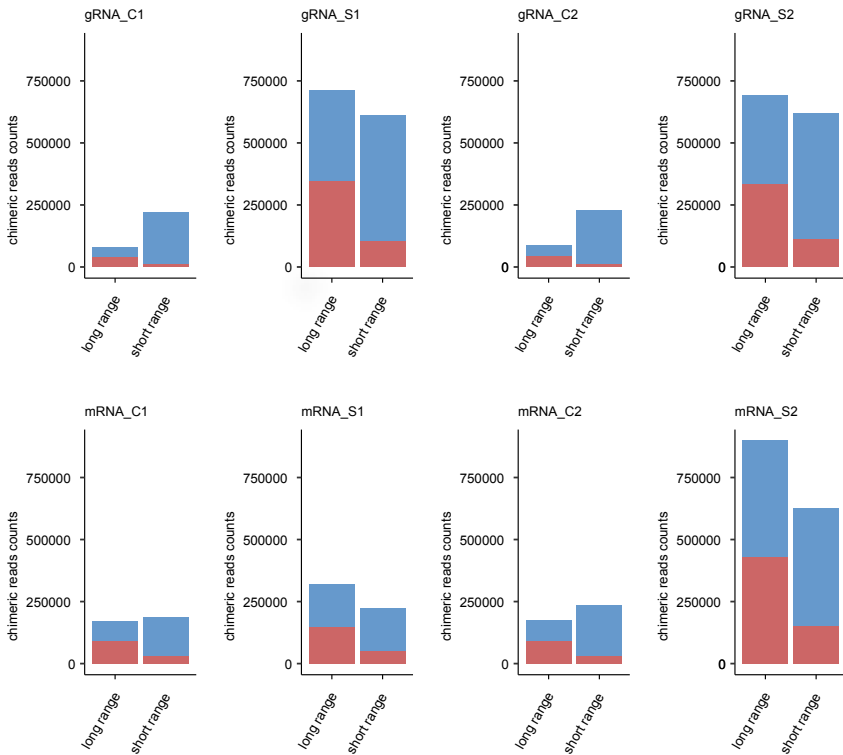



# Supplementary Fig4

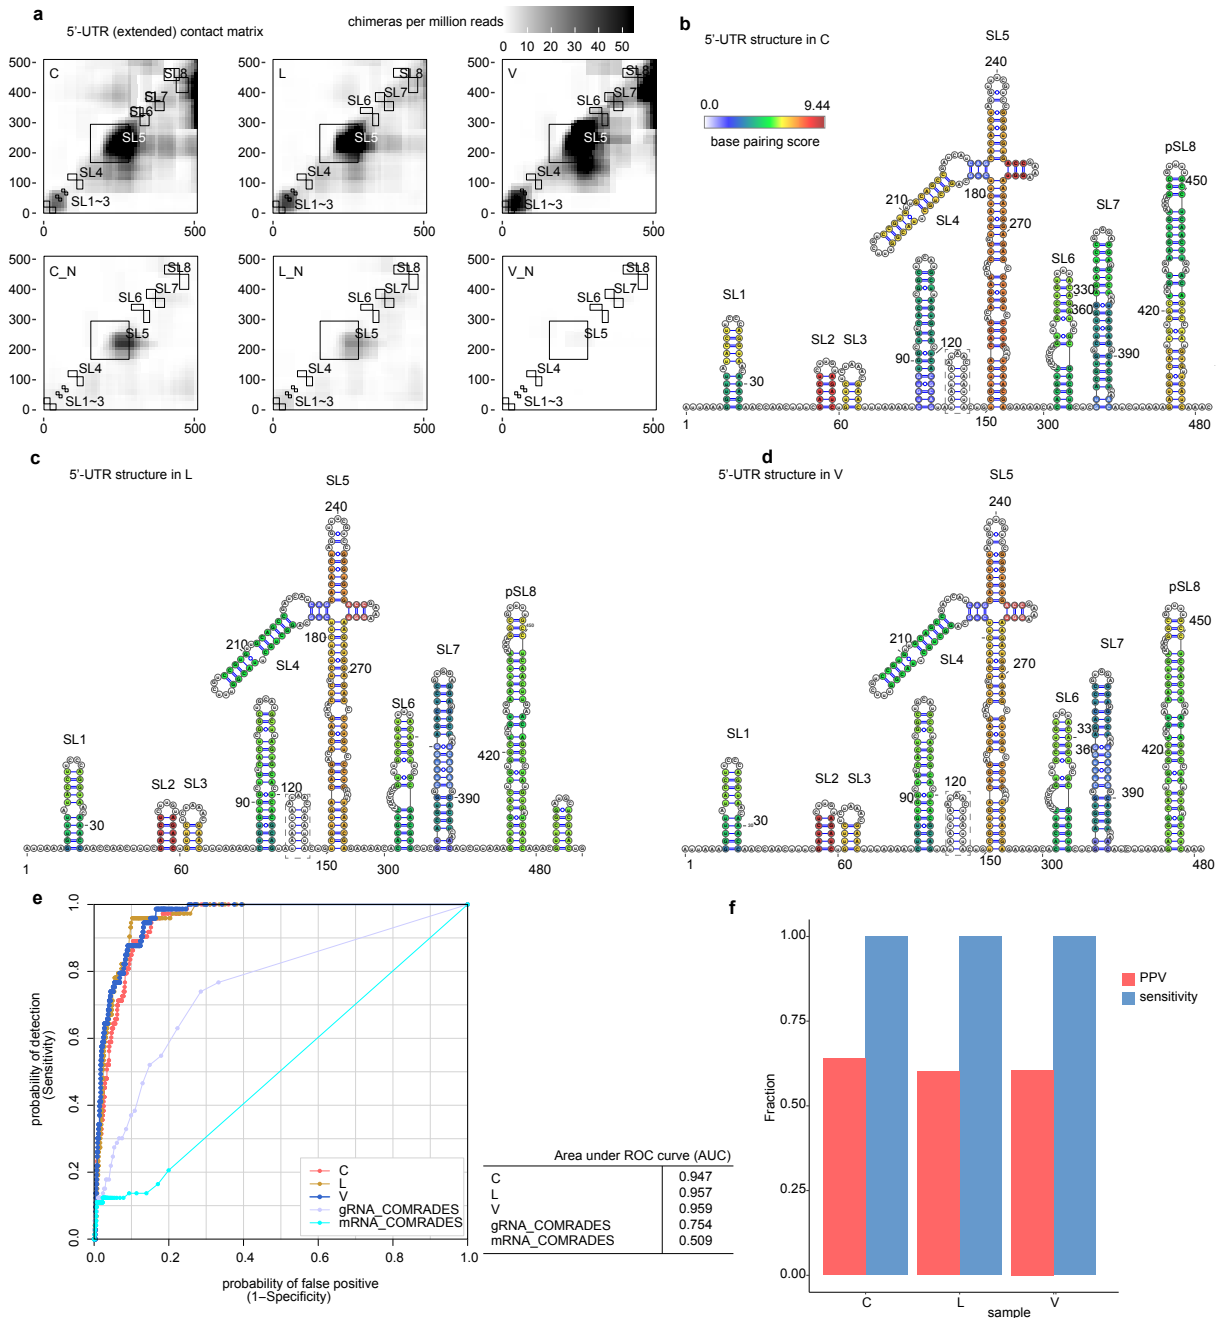

### Supplementary Fig 5

**a**

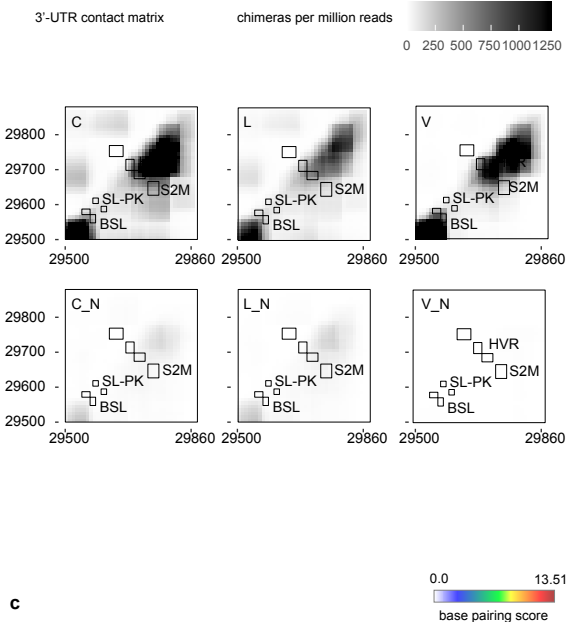

**b**

canonical 3'-UTR (conformation A in Morandi, E., et al 2021)

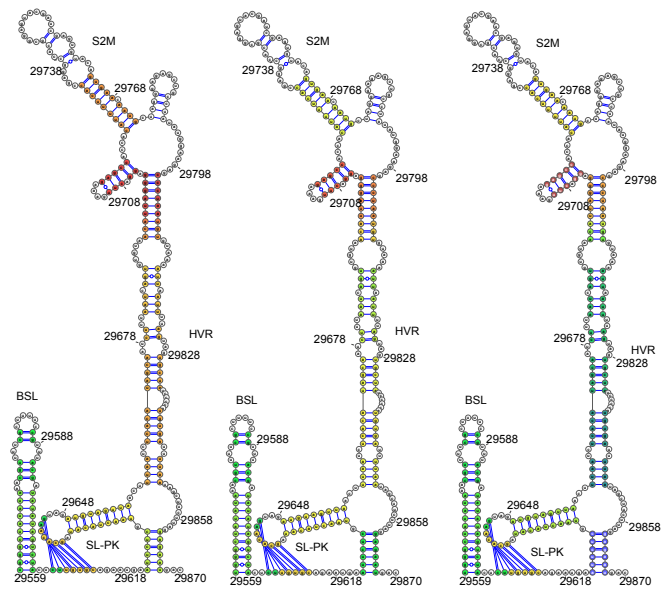

**c**

conformation B (Morandi, E., et al 2021)

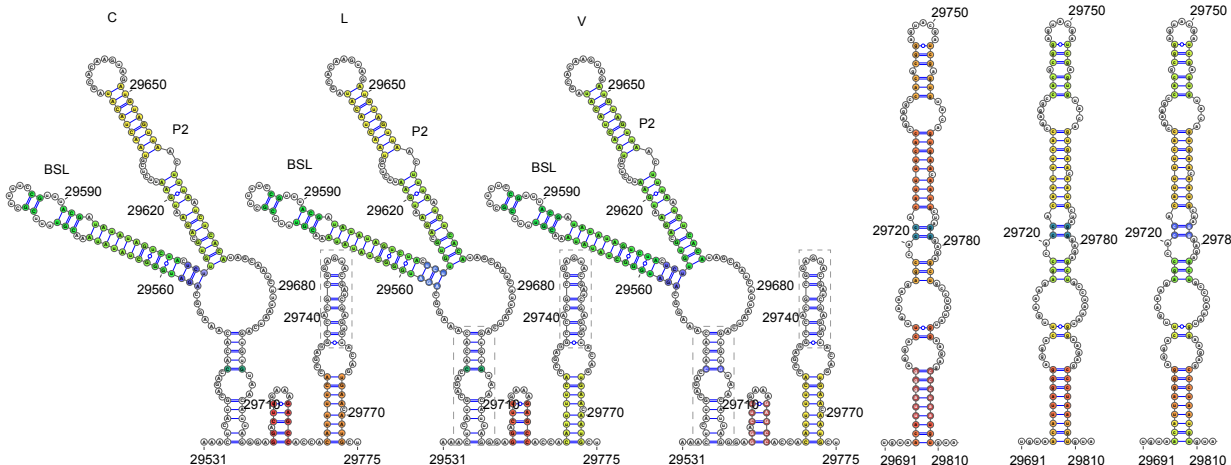

**d** alternative S2M

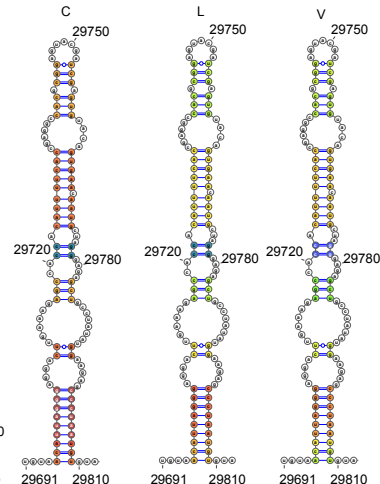

**e**

canonical 3'-UTR in COMRADES (O Ziv et al, 2020)

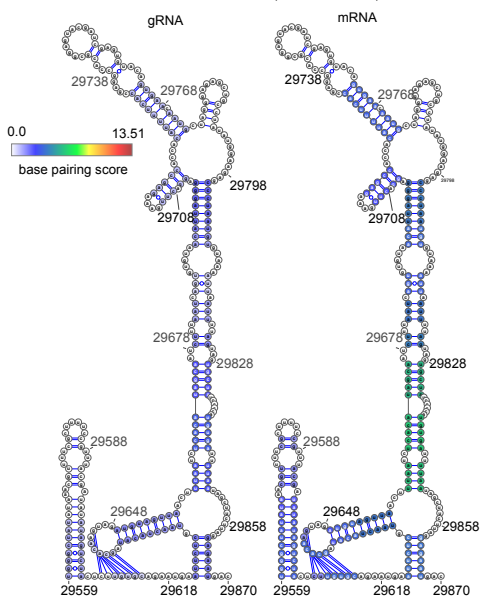

**f**

conformation B of 3'-UTR in COMRADES (O Ziv et al, 2020)

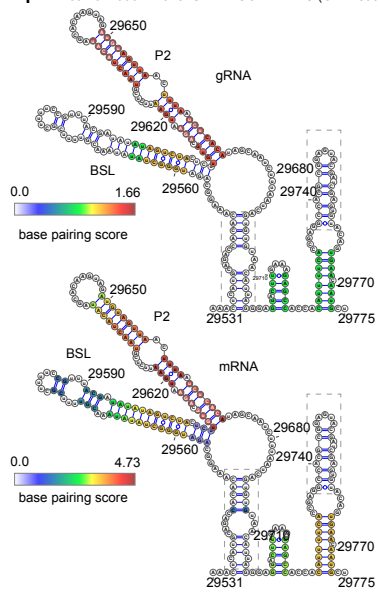

**g**

alternative S2M in COMRADES

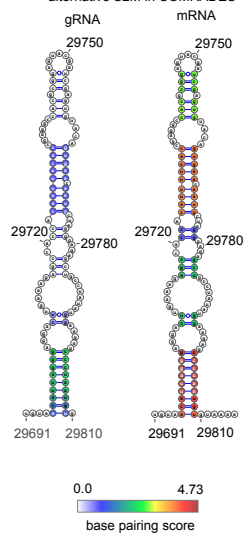

## Supplementary Fig6

### a genome cyclization

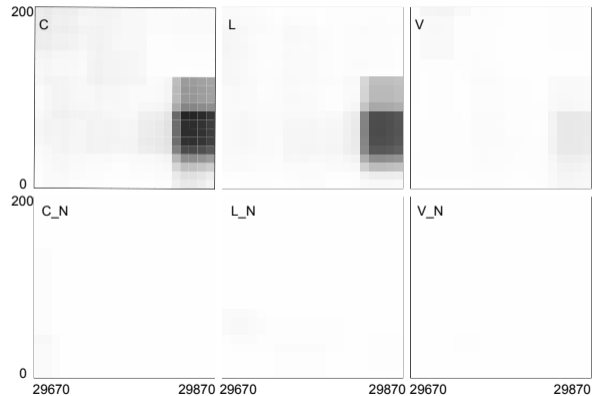

### b

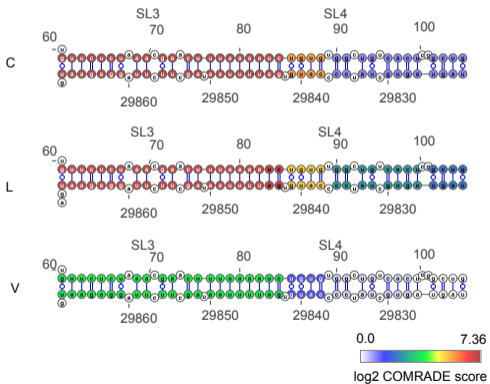

# Supplementary Fig7

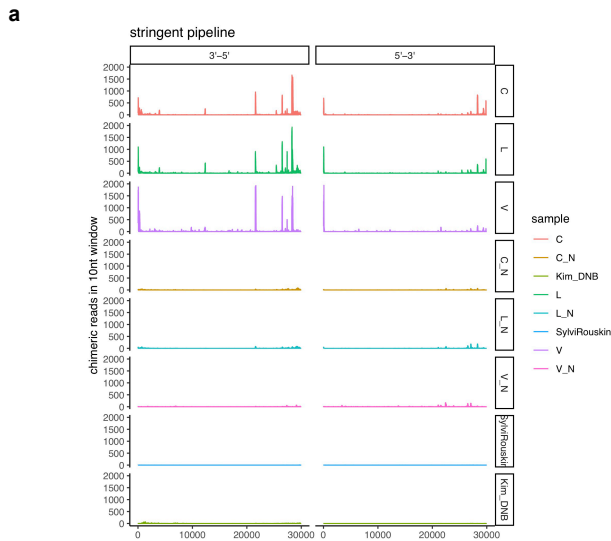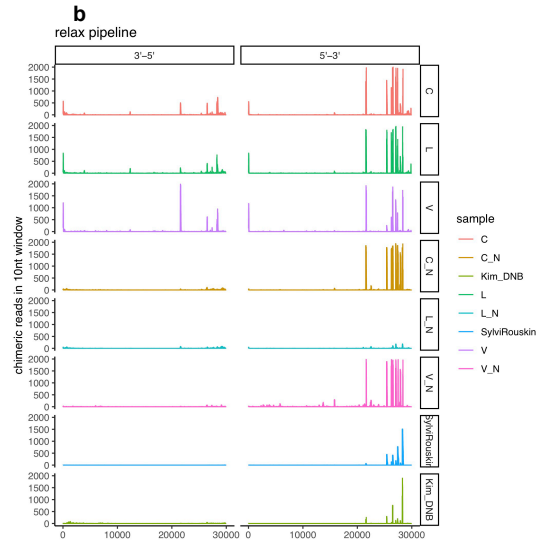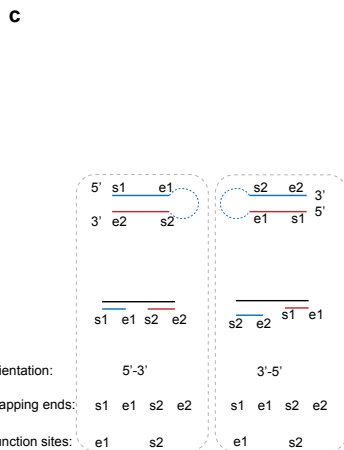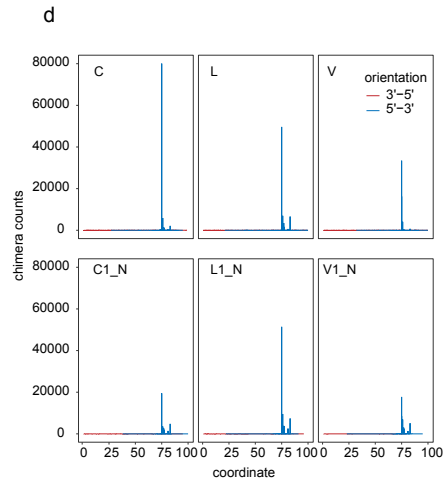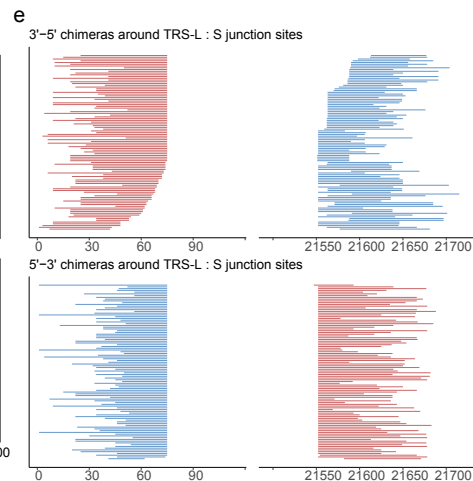

Supplementary Fig8

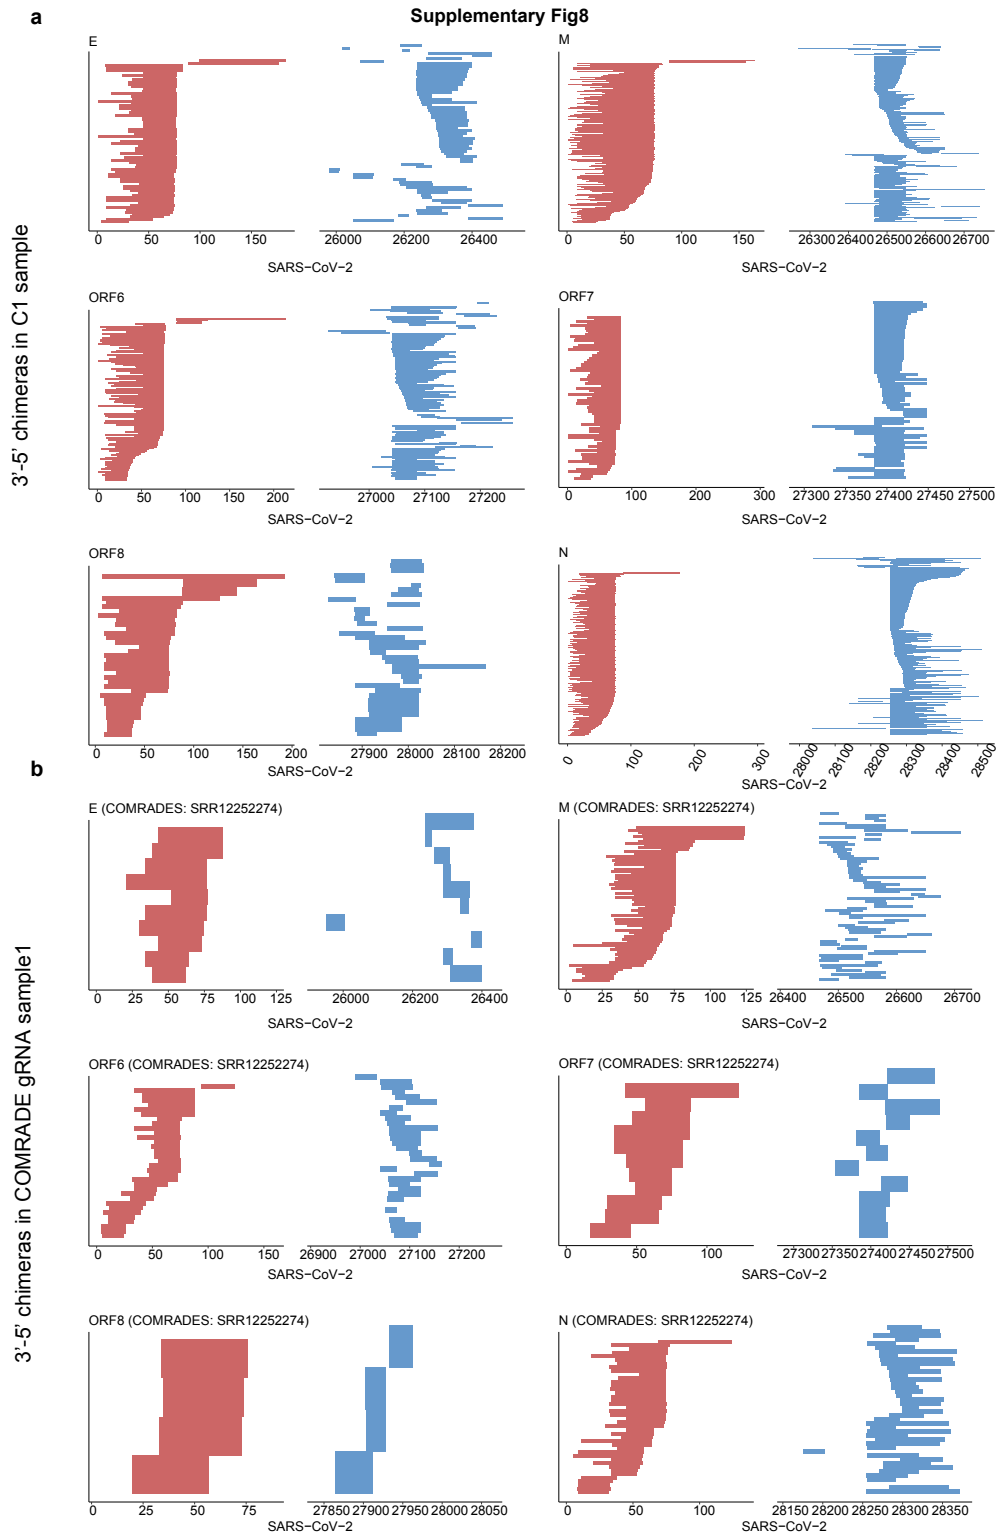

# Supplementary Fig9

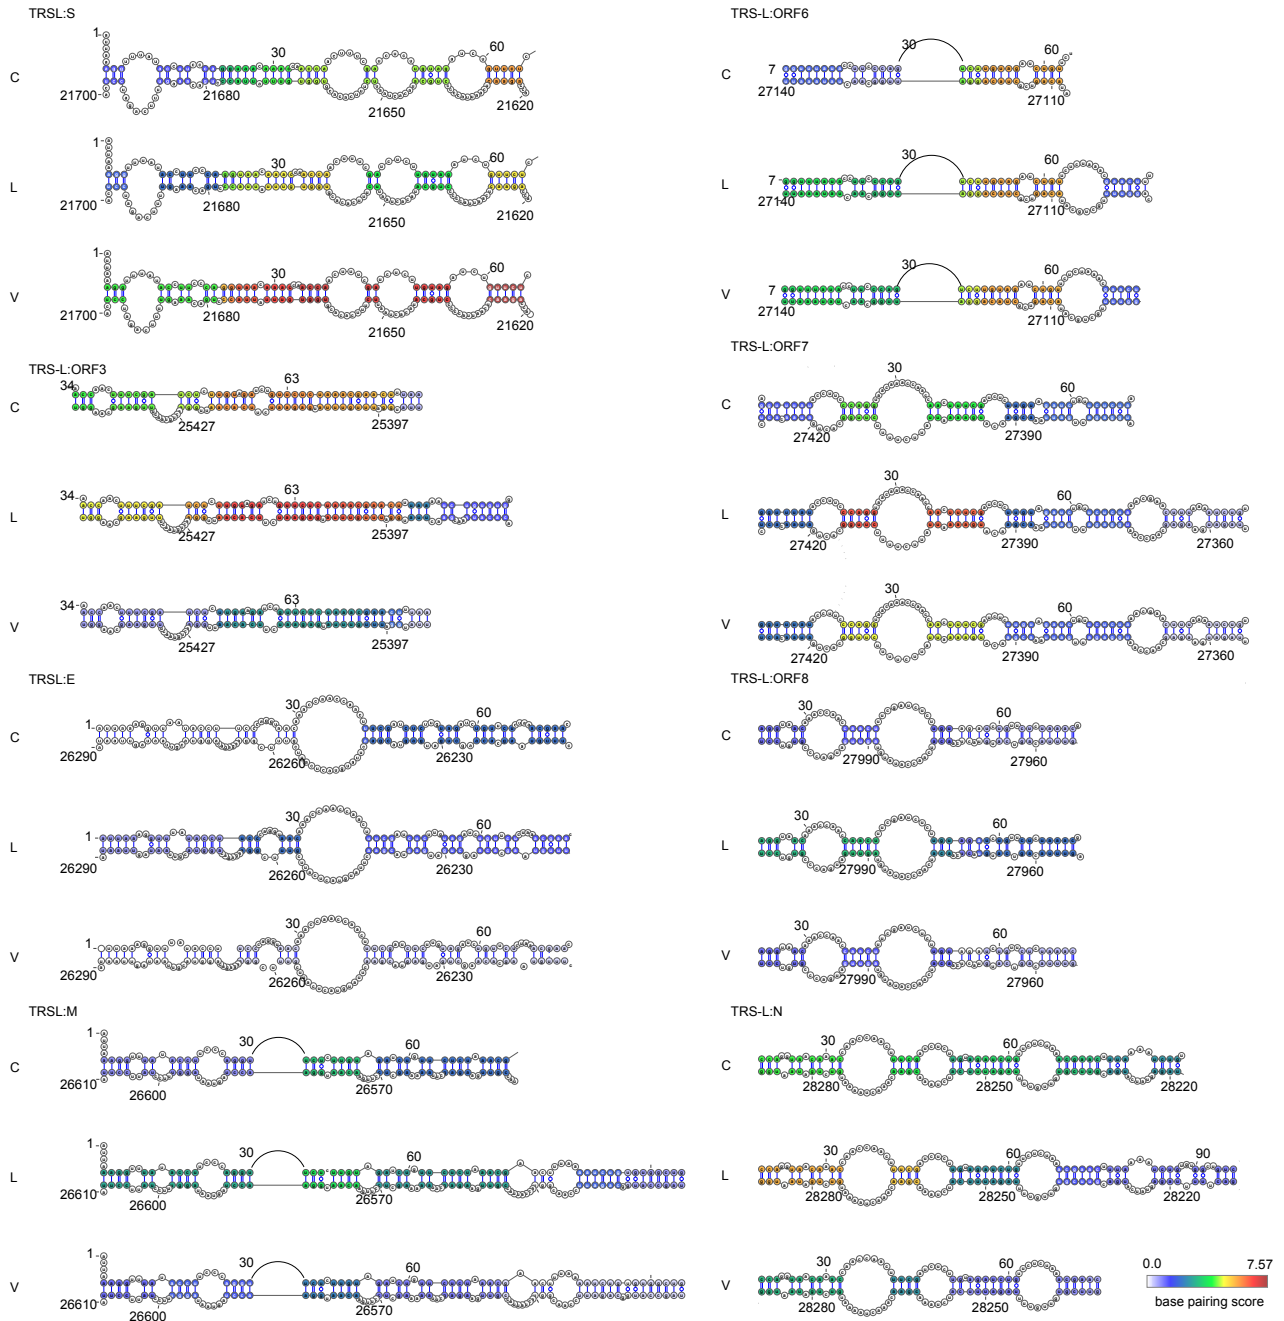

## Supplementary Fig10

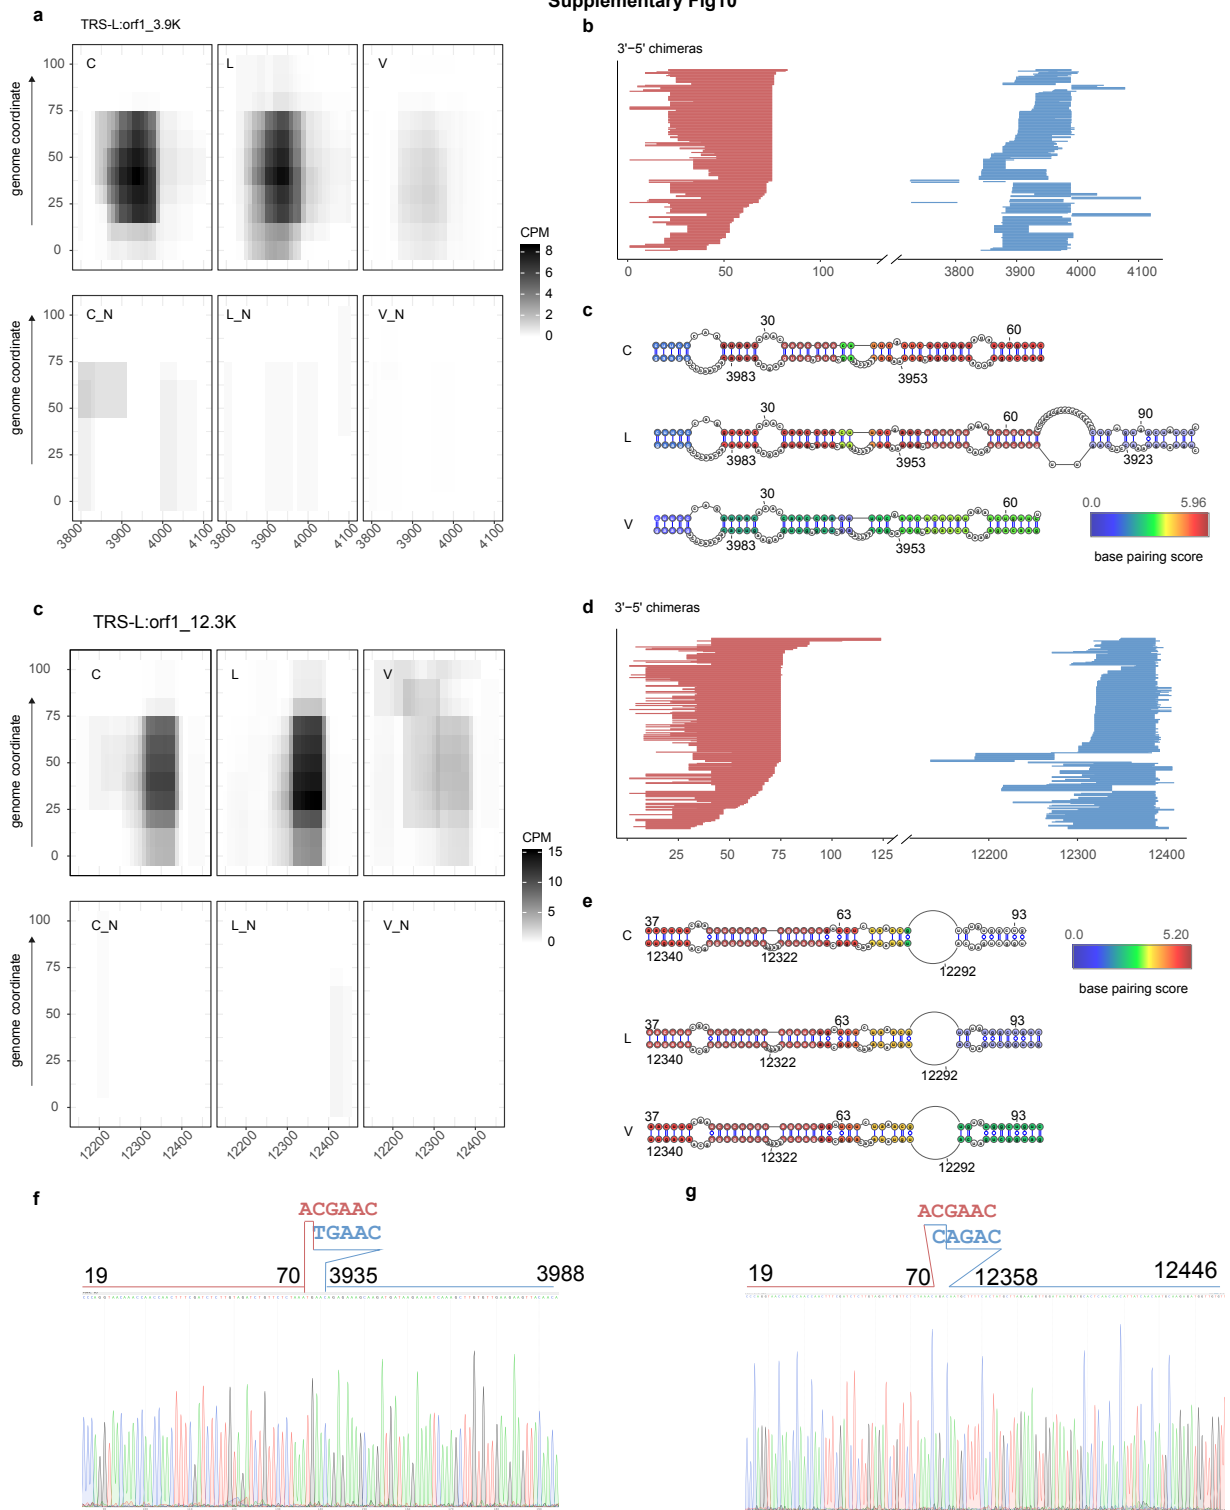

# Supplementary Fig11

**a**

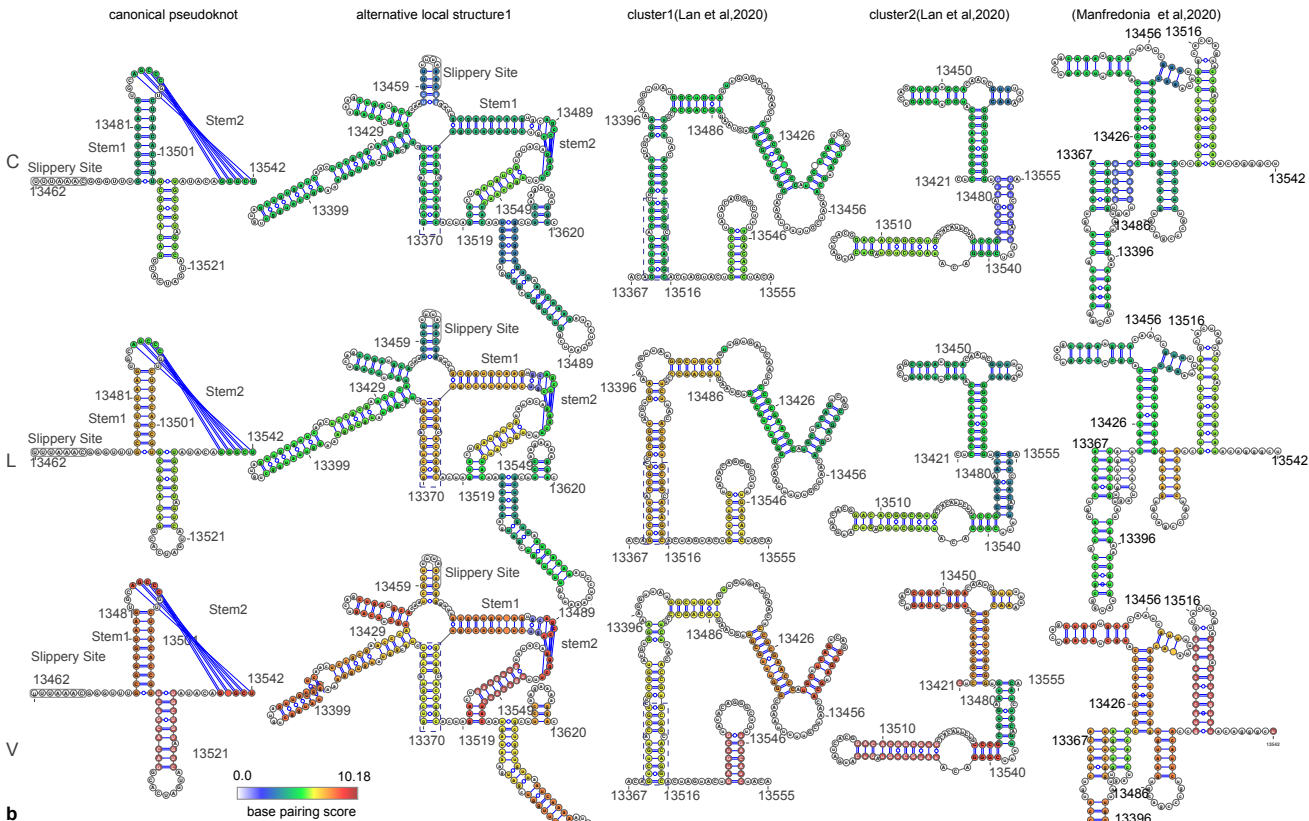

**b**

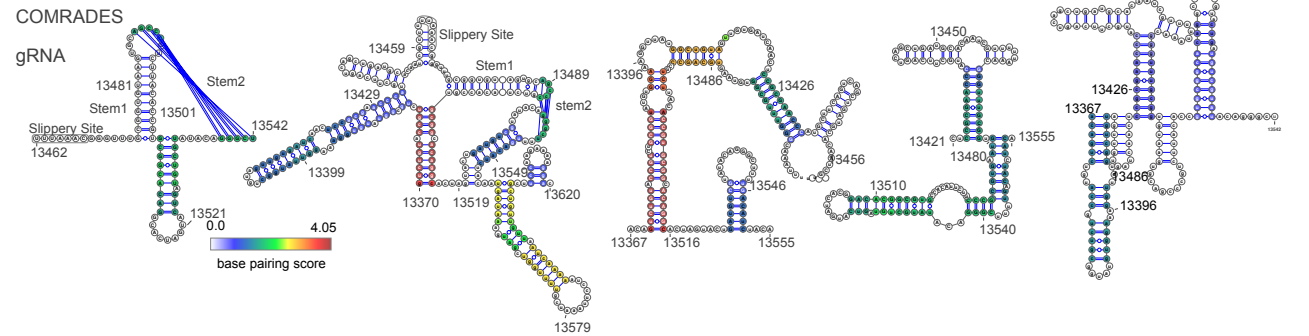



# Supplementary Fig12

Ziv's arch

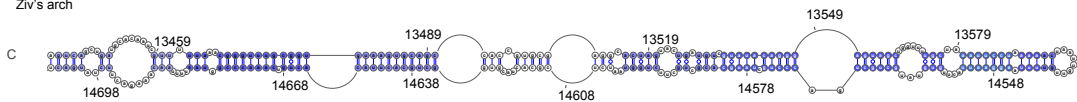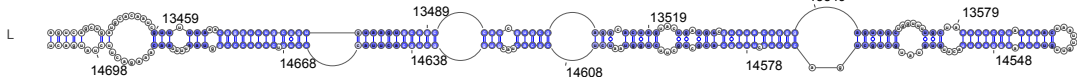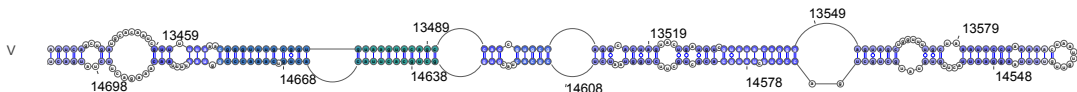

arch 2

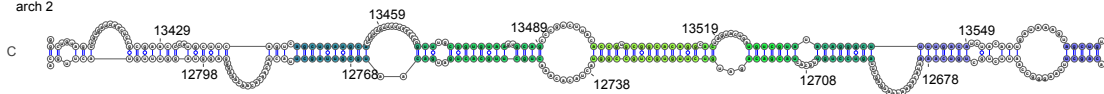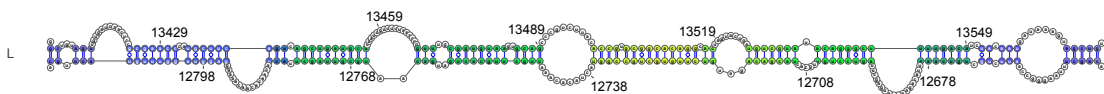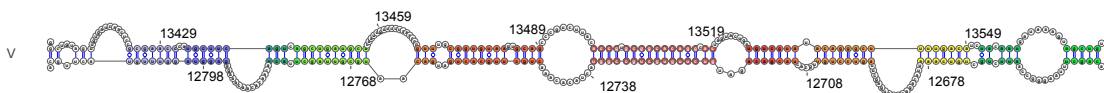

arch 3

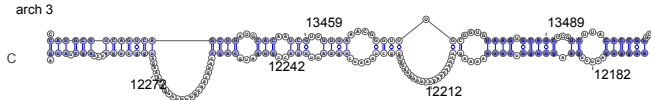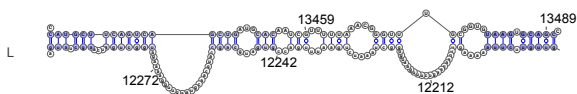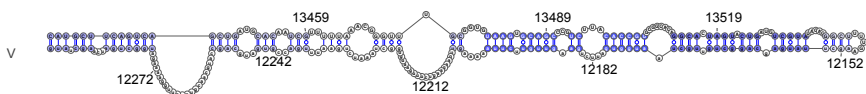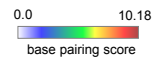

# Supplementary Fig13

FSE (Arch1)

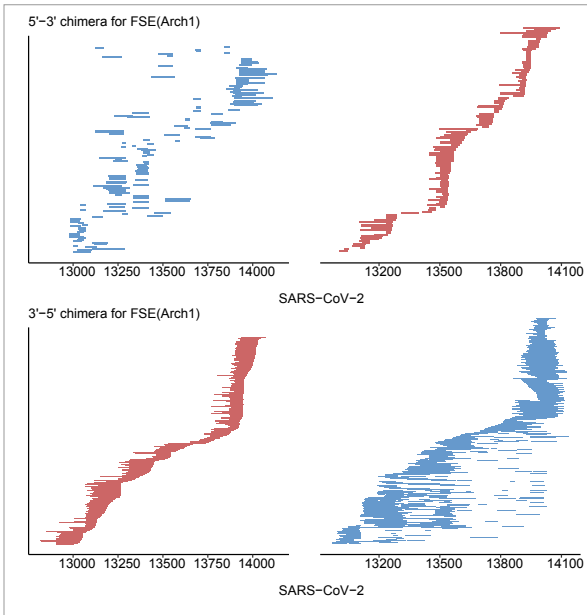

Ziv's Arch

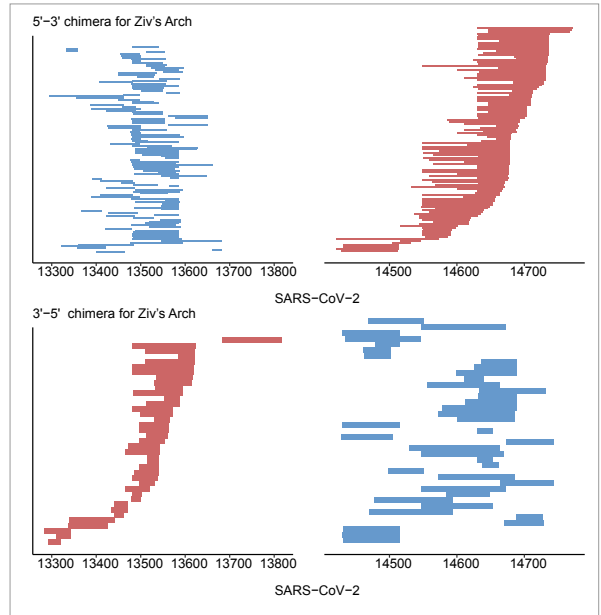

Arch2

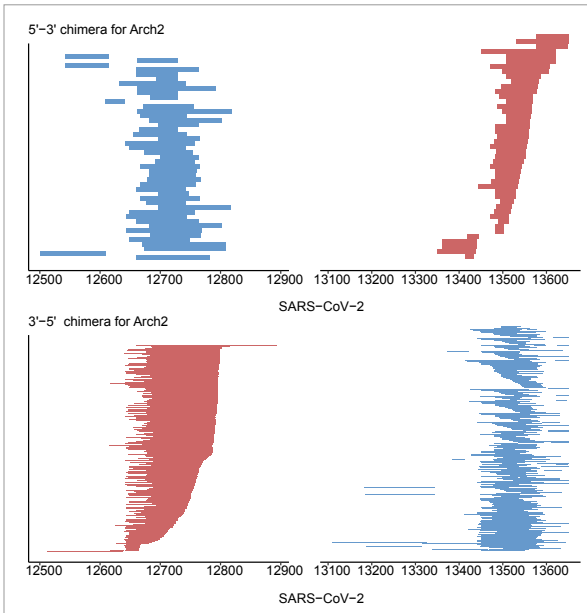

Arch3

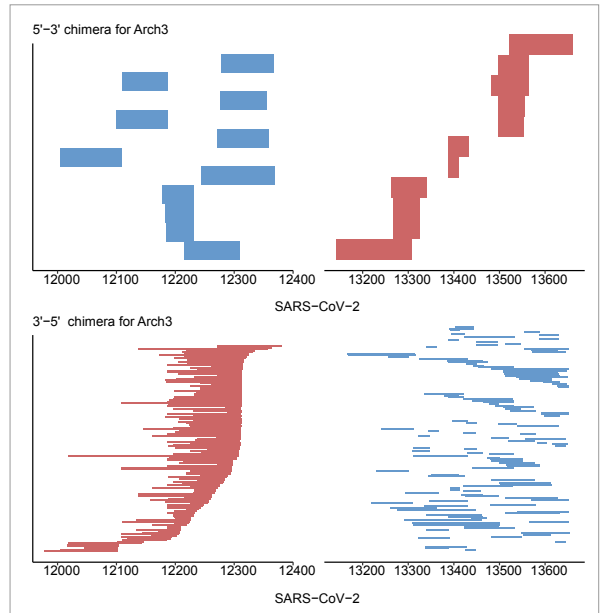

# Supplementary Fig14

FSE (Arch1)

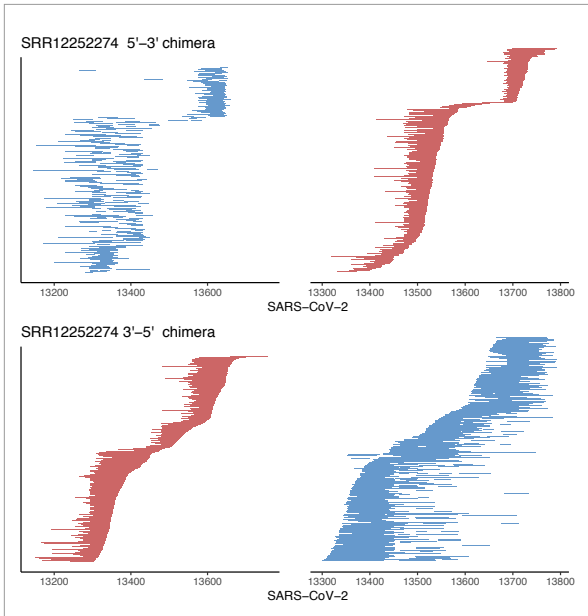

Ziv's Arch

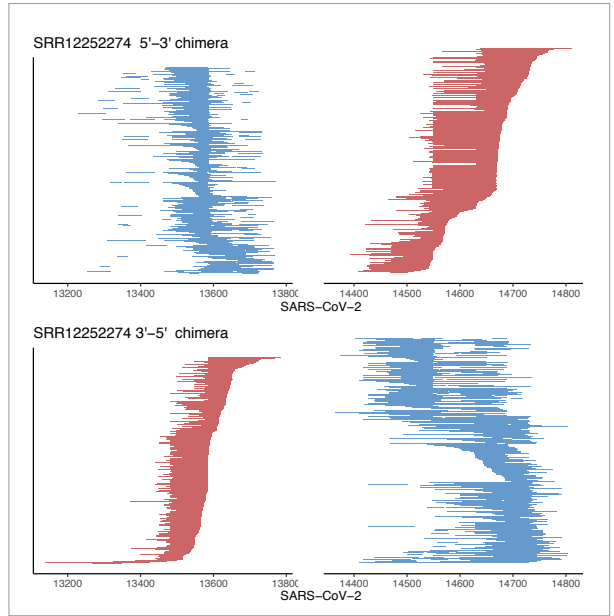

Arch2

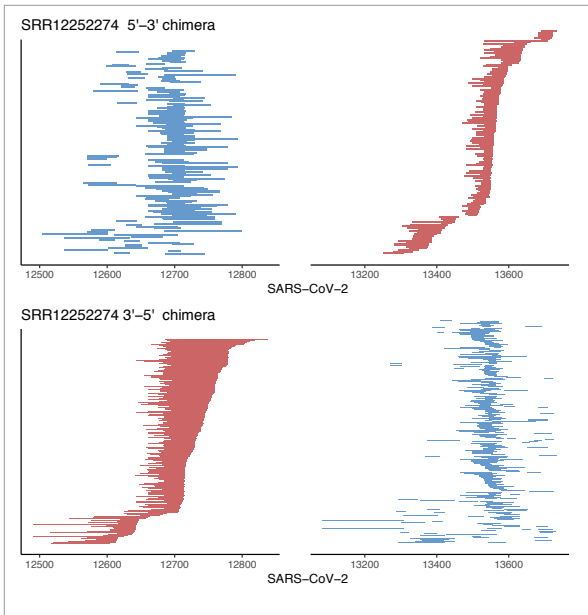

Arch3

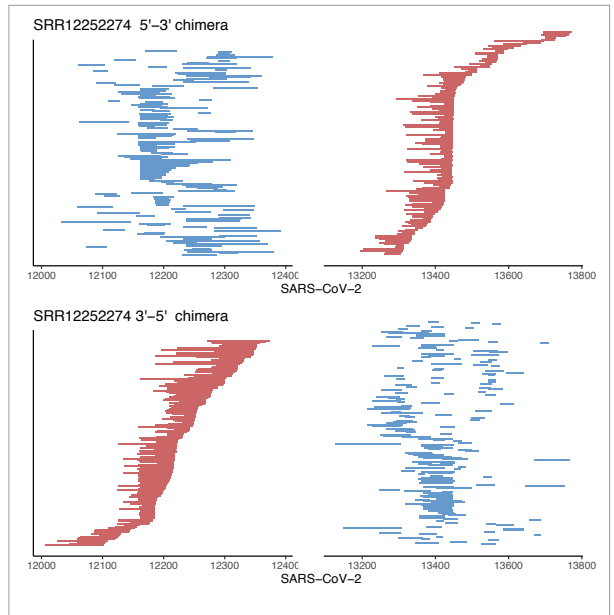

# Supplementary Fig15

**a**

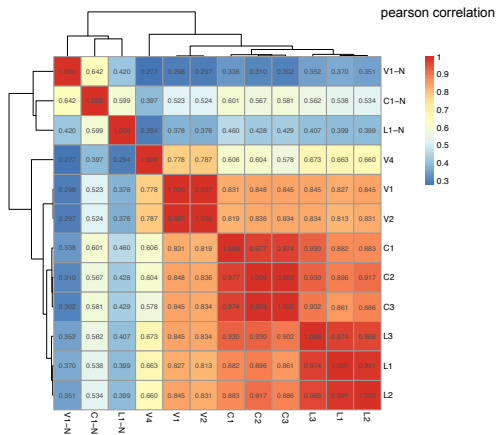

**b**

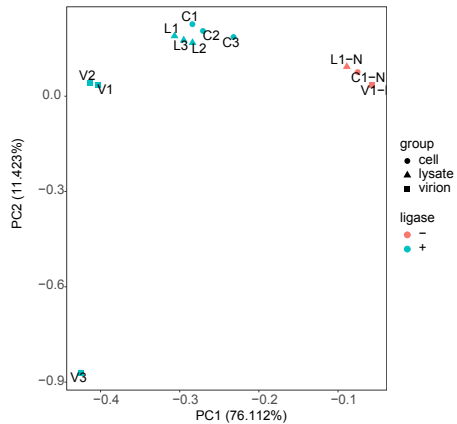

Supplementary Fig16

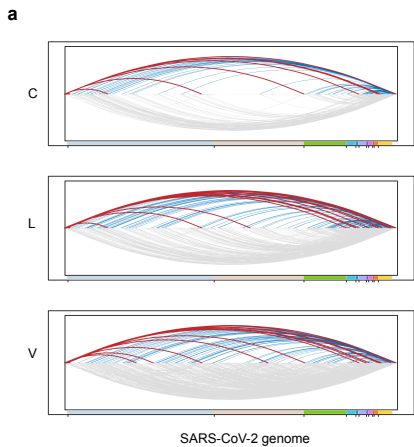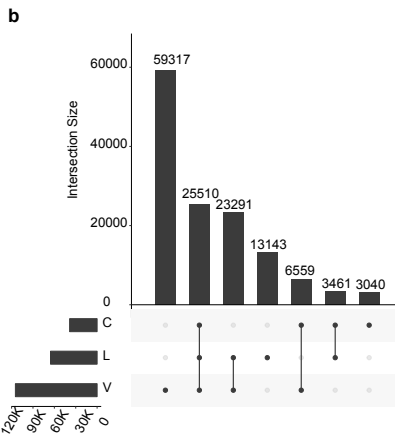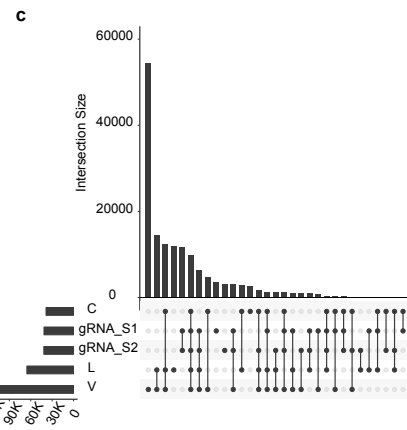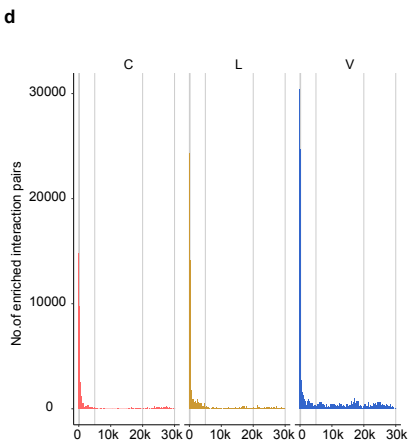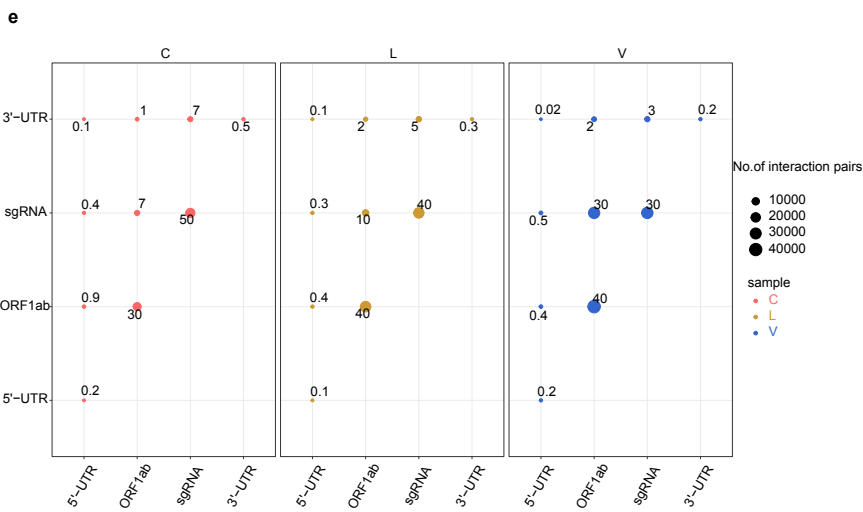

# Supplementary Fig17

**a**

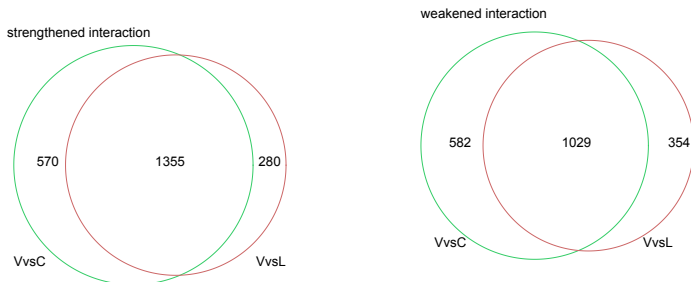

**b**

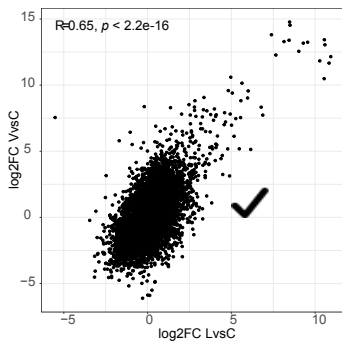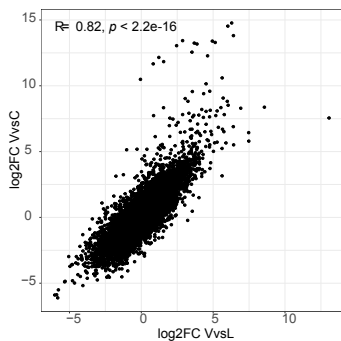

**c**

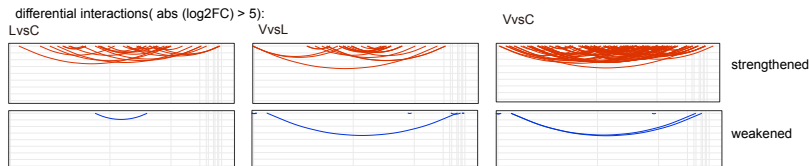

**d**

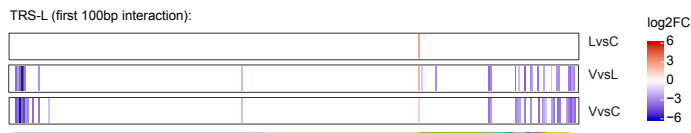

### Supplementary Fig18

**a**

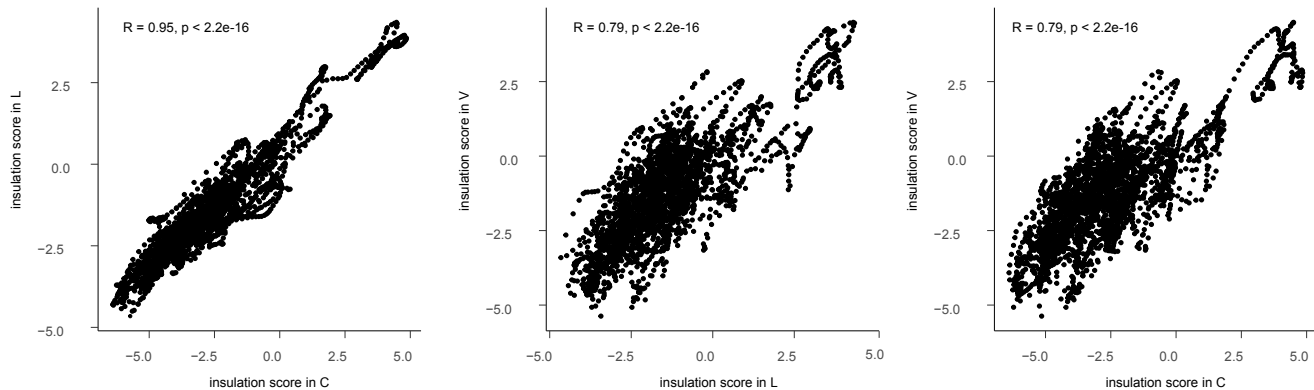

**b**

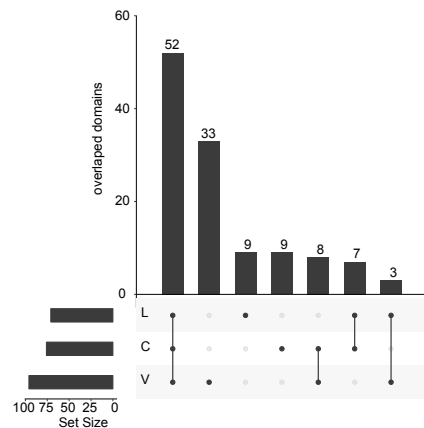

**c**

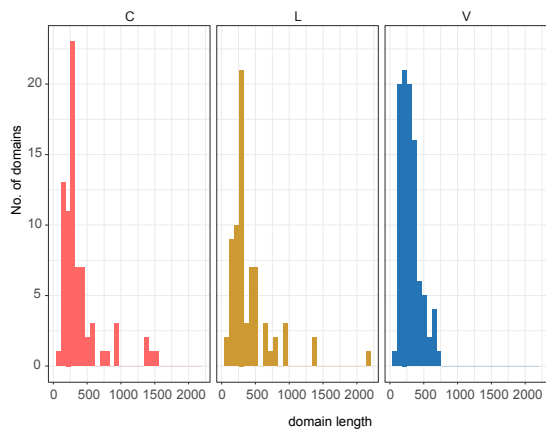

**d**

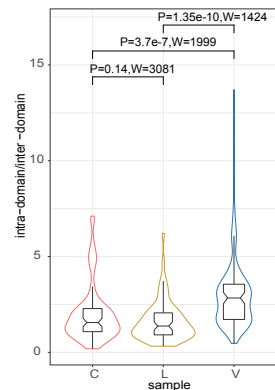

Supplementary Fig19

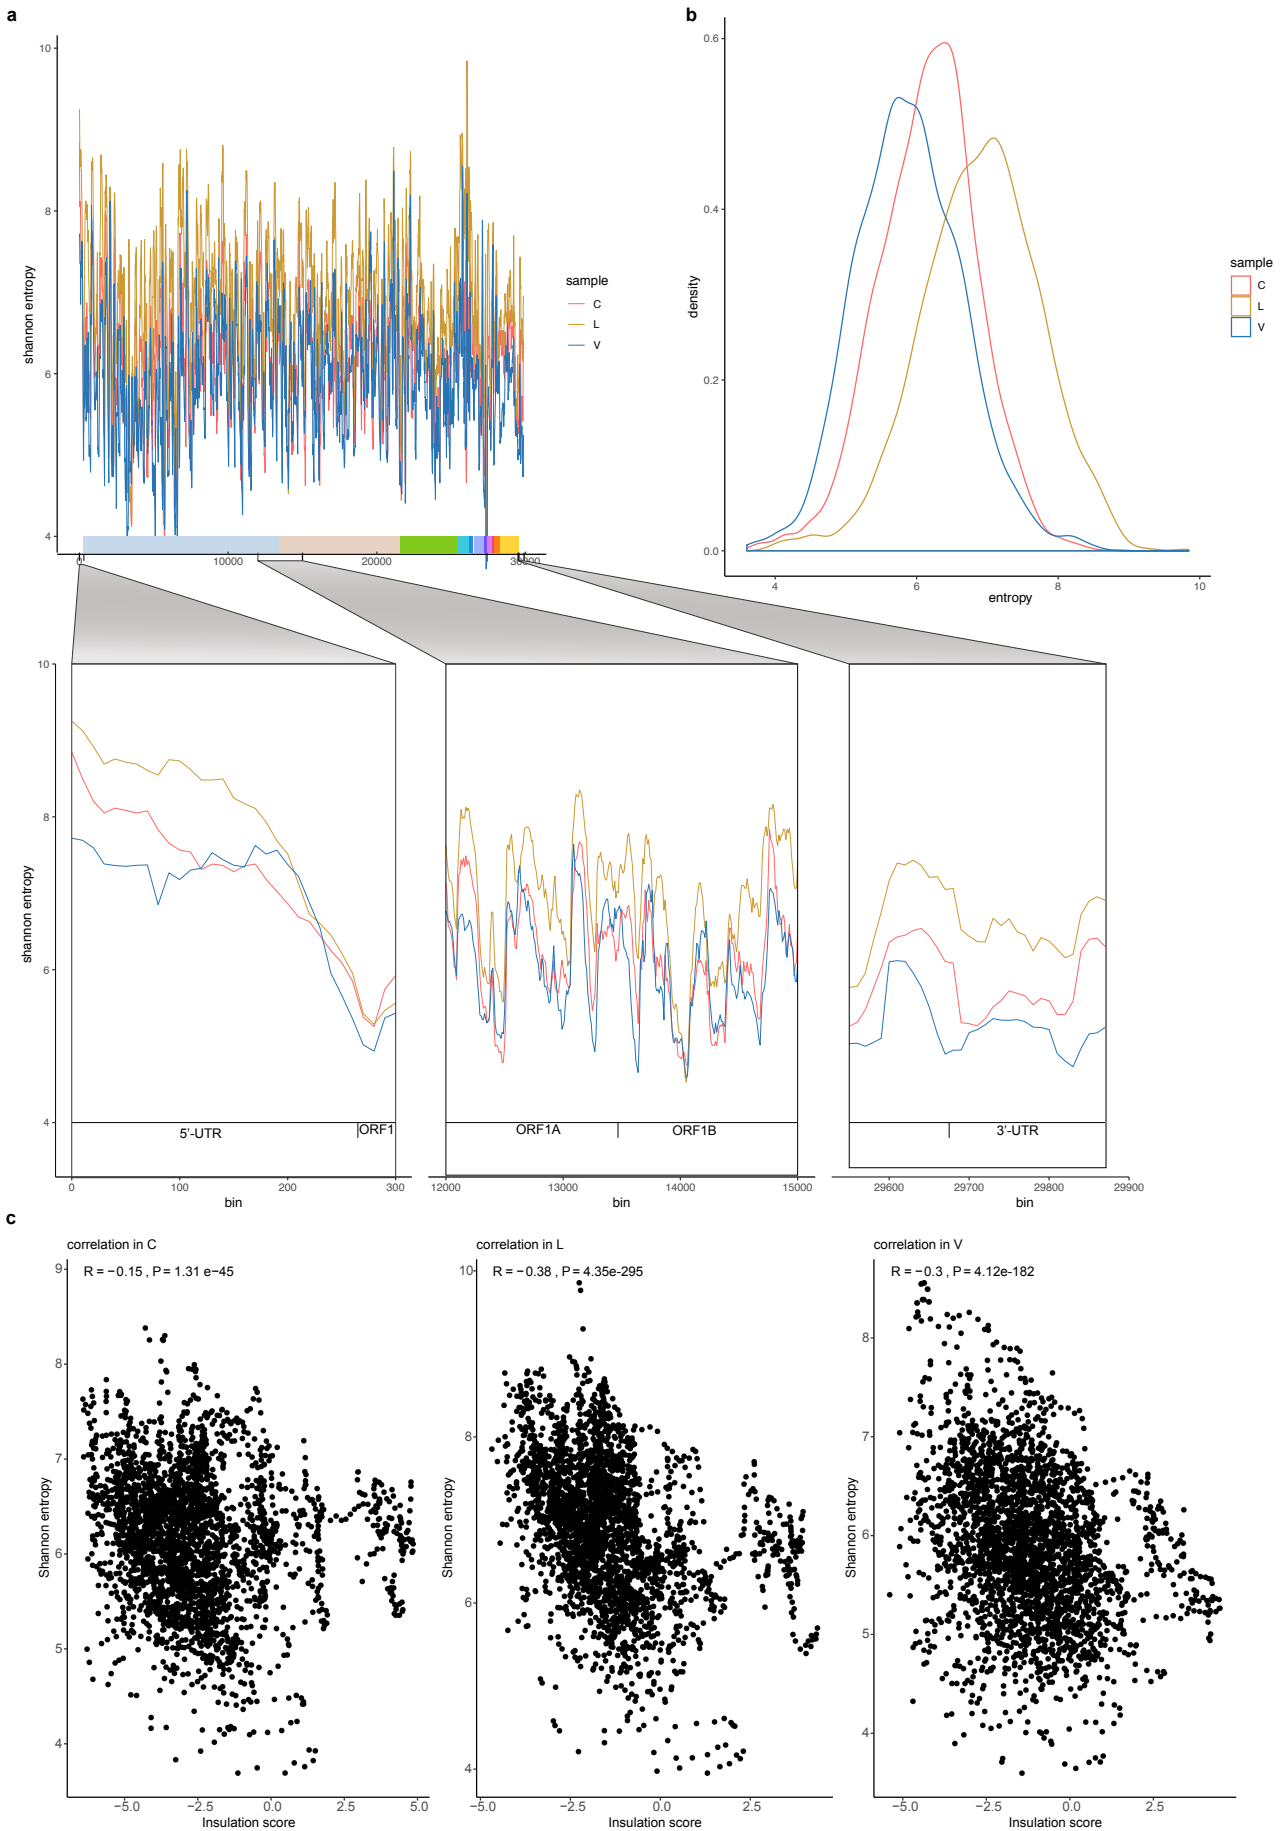



Supplementary Fig20

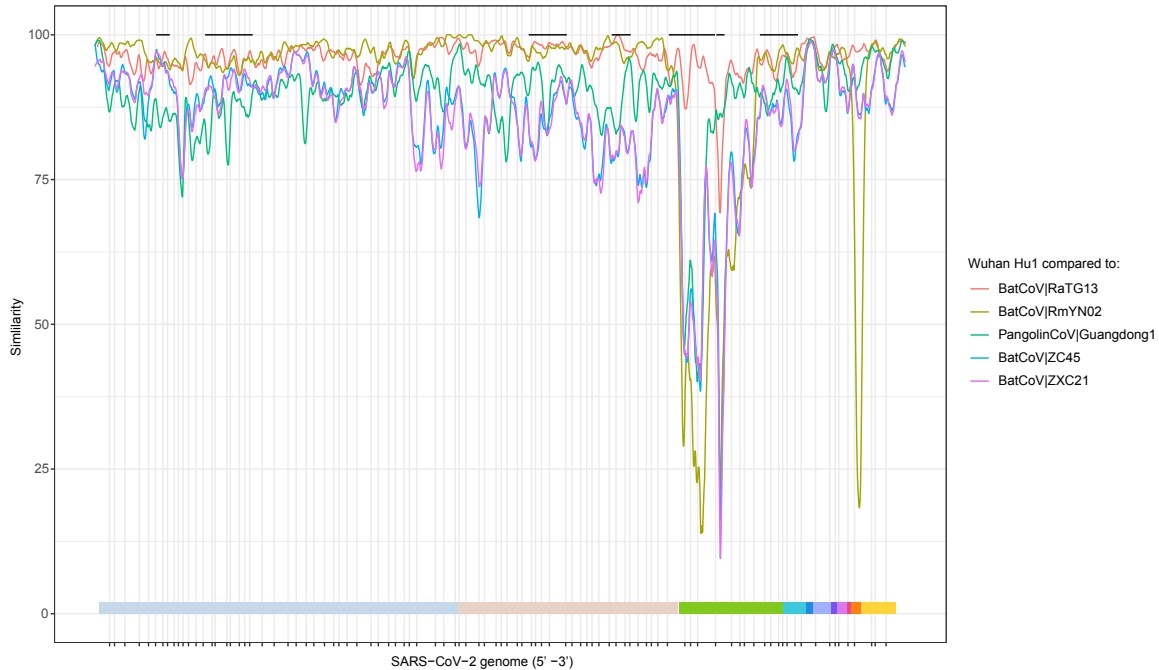

Supplement: 41467_2021_25999_MOESM1_ESM.pdf [file 41467_2021_25999_MOESM1_ESM.pdf]
